# Supplementary material for: Medication Adherence Apps: Review and Content Analysis
Source: PubMed Central journal article supplement (PMC5878368; doi:10.2196/mhealth.6432), 2018-03-16
Supplement: mhealth_v6i3e62_app1.pdf [file mhealth_v6i3e62_app1.pdf]

| <b><u>Data term extracted</u></b> |
|-----------------------------------|
| Application name                  |
| Developer                         |
| Year of release                   |
| Last update (if available)        |
| Store available in                |
| Cost                              |
| In app purchases                  |
| Application rating (if available) |
| Website (if available)            |
